# Supplementary material for: Internal Versus External Frame of Reference in Functional Movement Disorders
Source: Atypon-hosted journal article supplement (doi:10.1176/appi.neuropsych.18110290), 2019-09-30
Supplement: appi.neuropsych.18110290.ds001.pdf [file appi.neuropsych.18110290.ds001.pdf]

**Supplementary Table S1: Correlations between general and health-specific LOC between groups**

| Group |                                  | Internal LOC-H |         | External “chance” LOC-H |         | External “doctors” LOC-H |         | External “other people” LOC-H |         |
|-------|----------------------------------|----------------|---------|-------------------------|---------|--------------------------|---------|-------------------------------|---------|
|       |                                  | r              | p-value | r                       | p-value | r                        | p-value | r                             | p-value |
| FMD   | Internal LOC-G                   | 0.19           | 0.22    | 0.00                    | 1.00    | 0.04                     | 0.79    | 0.13                          | 0.41    |
|       | External “chance” LOC-G          | 0.00           | 0.99    | 0.34                    | 0.02*   | 0.25                     | 0.10    | 0.11                          | 0.48    |
|       | External “powerful others” LOC-G | 0.17           | 0.26    | 0.16                    | 0.31    | 0.31                     | 0.04*   | 0.28                          | 0.07    |
| PD    | Internal LOC-G                   | 0.08           | 0.53    | 0.28                    | 0.02*   | 0.43                     | <0.001* | 0.10                          | 0.42    |
|       | External “chance” LOC-G          | -0.03          | 0.83    | 0.27                    | 0.03*   | -0.02                    | 0.90    | 0.09                          | 0.46    |
|       | External “powerful others” LOC-G | 0.05           | 0.70    | -0.01                   | 0.94    | 0.02                     | 0.86    | 0.36                          | <0.001* |
| FD    | Internal LOC-G                   | -0.29          | 0.06    | 0.06                    | 0.70    | 0.01                     | 0.93    | -0.37                         | 0.02*   |
|       | External “chance” LOC-G          | 0.05           | 0.76    | 0.47                    | <0.001* | 0.04                     | 0.78    | 0.21                          | 0.17    |
|       | External “powerful others” LOC-G | 0.24           | 0.12    | 0.43                    | <0.001* | 0.02                     | 0.89    | 0.40                          | 0.01*   |

FMD, Functional movement disorders; PD, Parkinson’s disease; FD, Focal dystonia; LOC-H, Multidimensional Health LOC Assessment - Form C; LOC-G, Levenson Multidimensional LOC Inventory; LOC, Locus of Control; r, spearman correlation coefficient. \* denotes statistical significance.

**Supplementary Table S2: Post-hoc unadjusted LOC mean differences between groups**

|                                         | <b>FMD vs. PD</b>      |                | <b>FMD vs. FD</b>      |                |
|-----------------------------------------|------------------------|----------------|------------------------|----------------|
|                                         | <b>Mean difference</b> | <b>p-value</b> | <b>Mean difference</b> | <b>p-value</b> |
| <b>Internal LOC-G</b>                   | -1.62                  | 0.65           | -3.07                  | 0.09           |
| <b>External “chance” LOC-G</b>          | -2.13                  | 0.54           | +1.79                  | 0.88           |
| <b>External “powerful others” LOC-G</b> | -1.38                  | 0.99           | +1.98                  | 0.59           |
| <b>Internal LOC-H</b>                   | +2.34                  | 0.12           | +5.42                  | <0.01          |
| <b>External “chance” LOC-H</b>          | -1.95                  | 0.29           | +0.35                  | 1.00           |
| <b>External “doctors” LOC-H</b>         | -1.32                  | 0.08           | -1.98                  | 0.01           |
| <b>External “other people” LOC-H</b>    | +0.17                  | 1.00           | +0.65                  | 1.00           |

LOC-H, Multidimensional Health LOC Assessment - Form C; LOC-G, Levenson Multidimensional LOC Inventory; LOC, Locus of Control; FMD, Functional movement disorders; PD, Parkinson’s disease; FD, Focal dystonia. P-value, Bonferroni-corrected p-value.
